# Supplementary material for: Constructing layered structure amidine-based pentazolate salts with low sensitivity
Source: Royal Society of Chemistry journal article supplement (doi:10.1039/d4ce00521j), 2024-01-01
Supplement: d4ce00521j1.pdf [file d4ce00521j1.pdf]

## Supporting Information

### Constructing Layered Structure Amidine-Based Pentazolate Salts with Low Sensitivity

Pengfei Wang<sup>1</sup>, Lile Liu<sup>1</sup>, Zebang Sun<sup>1</sup>, Feng qin<sup>1</sup>, Lei Shi<sup>1</sup>, Chao gao<sup>1</sup>, Yang Du<sup>1</sup>, Chong Zhang<sup>1</sup> Bingcheng Hu<sup>1</sup>  
and Chengguo Sun<sup>1,2</sup> \*

<sup>1</sup> School of Chemical Engineering, Nanjing University of Science and Technology, Nanjing, Jiangsu 210094,  
China;

<sup>2</sup> School of Chemical Engineering, University of Science and Technology Liaoning, Anshan, Liaoning, 114051,  
China;

E-mail: cgsun@njust.edu.cn

## Contents

|                                                    |    |
|----------------------------------------------------|----|
| 1. Experimental section.....                       | 3  |
| 2. IR, Raman and <sup>1</sup> H NMR spectrum ..... | 5  |
| 3. Crystal structure data.....                     | 8  |
| 4. TG analysis .....                               | 15 |
| 5. ESP and NCI analysis .....                      | 15 |
| 7. References.....                                 | 20 |

## 1. Experimental section.

**Caution!** Although the authors did not encounter difficulties in dealing with these energetic materials, some compounds in this study are extremely dangerous. Every step must be carried out on a small scale and according to the best safety practices such as wearing face shields and leather gloves.

### 1.1 Reagents and instruments

All reagents and solvents were purchased from MACKLIN and Aladdin as analytical grade and were used as received. TG and DSC plots were acquired on a simultaneous thermal analyzer (Netzsch STA449 F3) at a scan rate of 10 °C/min<sup>-1</sup> in perforated Al containers under a nitrogen flow of 50 mL /min<sup>-1</sup>. IR spectra were recorded on a Bruker ALPHA II fourier transform infrared spectrometer. Mass spectrum analyses were carried out on a Thermo Scientific mass spectrometer. Powder X-ray diffraction (PXRD) measurements were performed on a Bruker D8 QUEST X-ray diffractometer using Mo K $\alpha$  ( $\lambda=0.71073\text{\AA}$ ) radiation. Morphology scanning were performed under thermal field emission scanning electron microscope (Apreo s). Impact and friction sensitivity measurements were performed using a standard BAM Fallhammer and BAM friction tester. The 1H spectra were recorded on a 500MHz (Bruker AVANCE III 500) nuclear magnetic resonance spectrometer. Elemental analyses were performed on a vario EL III CHNOS elemental analyzer.

### 1.2 Computational methods

All enthalpy calculations were performed with the Gaussian09 (Revision D.01) suite of programs<sup>1</sup>. The geometric optimization, frequency analysis and single-point energies were accomplished at the B3LYP/6-311+G\*\* level. The enthalpy of an isodesmic reaction was obtained by combining the B3LYP/6-311+G\*\* energy difference for the reactions, the scaled zero point energies (ZPE), values of thermal correction (HT), and other thermal factors. The solid phase heat of formation was calculated based on the Born–Haber energy cycle according to the literature method. The NCI and ESP plots were calculated using Multiwfn and visualized using the VMD program<sup>2-6</sup>. Hirshfeld surfaces and associated 2D fingerprints were generated using CrystalExplorer<sup>17</sup>.

### 1.3 X-ray crystallography

The single-crystal X-ray diffraction measurements for all the compounds were conducted on a Bruker D8 QUEST diffractometer using Mo-K $\alpha$  radiation ( $\lambda=0.71073\text{\AA}$ ) with a graphite monochromator at 150K or 293 K. An Oxford Cobra low temperature device was used to maintain the low temperature. Integration and scaling of intensity data were accomplished using the SAINT program. The structures were solved by intrinsic methods using SHELXT2018 and refinement was carried out by a full-matrix least-squares technique using SHELXL2018/3. Hydrogen atoms were refined isotropically, and the heavy atoms were refined anisotropically. N–H and O–H hydrogens were located from different electron density maps, and C–H hydrogens were placed in calculated positions and refined with a riding model. Data were corrected for the effects of absorption using SADABS. Relevant crystal data and refinement results are summarized in Table S1-S28.

### 1.4 Synthetic procedures

AgN<sub>5</sub> was synthesized according to our previous method.

**Formamidine pentazolate (1):** Dispersed 1.05 mmol of pentazolate silver salt in a mixed solution of methanol and water in a ratio of 9:1. Added 1.00 mmol of methanol solution of methylamine hydrochloride to the above mixed solution. The reaction was stirred at room temperature for 6 hours under dark conditions. Filtered to remove silver chloride precipitate, and dried the filtrate under reduced pressure to obtain a white solid. Yield: 109.2 mg (0.95 mmol, 95%). Td (onset): 105 °C. IR:

$\tilde{\nu} = 3152, 3035, 1702, 1418, 1327, 1215, 1067, 655, 559 \text{ cm}^{-1}$ . Raman:  $\tilde{\nu} = 3037, 1674, 1413, 1170, 1124, 1064, 690, 563 \text{ cm}^{-1}$ .  $m/z$  (ESI<sup>+</sup>-MS): 44.83 [M-N<sub>5</sub>]<sup>+</sup>. IS: >40 J. FS: >360 N. <sup>1</sup>H NMR (500 MHz, DMSO-d<sub>6</sub>)  $\delta$  8.74 (s, 4H), 7.77 (s, 1H). Elemental analysis (%) calcd. for CH<sub>5</sub>N<sub>7</sub> (115.12): C, 10.44; H, 4.38; N, 85.18; found: C, 10.27; H, 4.03; N, 85.70.

**Acetamidine pentazolate (2):** Dispersed 1.05 mmol of pentazolate silver salt in a mixed solution of methanol and water in a ratio of 9:1. Added 1.00 mmol of methanol solution of methylamine hydrochloride to the above mixed solution. The reaction was stirred at room temperature for 6 hours under dark conditions. Filtered to remove silver chloride precipitate, and dried the filtrate under reduced pressure to obtain a white solid. Yield: 120.0 mg (0.93 mmol, 93%). Td (onset): 116 °C. IR:  $\tilde{\nu} = 3311, 3133, 2779, 1706, 1403, 1327, 1211, 1067, 997, 655, 552 \text{ cm}^{-1}$ . Raman:  $\tilde{\nu} = 1412, 1172, 1122, 1095, 1011, 565 \text{ cm}^{-1}$ .  $m/z$  (ESI<sup>+</sup>-MS): 59.11 [M-N<sub>5</sub>]<sup>+</sup>. IS: >40 J. FS: >360 N. <sup>1</sup>H NMR (500 MHz, DMSO-d<sub>6</sub>)  $\delta$  2.00 (s, 3H), 9.10 (s, 2H), 8.62 – 8.58 (m, 2H). Elemental analysis (%) calcd. for C<sub>2</sub>H<sub>7</sub>N<sub>7</sub> (129.15): C, 18.60; H, 5.47; N, 75.93; found: C, 18.28; H, 5.63; N, 76.09.

**Cyclopropane-1-carboximidamide pentazolate (3):** Dispersed 1.05 mmol of pentazolate silver salt in a mixed solution of methanol and water in a ratio of 9:1. Added 1.00 mmol of methanol solution of methylamine hydrochloride to the above mixed solution. The reaction was stirred at room temperature for 6 hours under dark conditions. Filtered to remove silver chloride precipitate, and dried the filtrate under reduced pressure to obtain a white solid. Yield: 145.8 mg (0.94 mmol, 94%). Td (onset): 122 °C. IR:  $\tilde{\nu} = 3309, 3086, 2781, 1688, 1519, 1439, 1210, 1106, 924, 813, 755, 644, 565, 454 \text{ cm}^{-1}$ . Raman:  $\tilde{\nu} = 3026, 1530, 1436, 1339, 1194, 1172, 1040, 918, 815, 766, 566, 459 \text{ cm}^{-1}$ .  $m/z$  (ESI<sup>+</sup>-MS): 84.96 [M-N<sub>5</sub>]<sup>+</sup>. IS: >40 J. FS: >360 N. <sup>1</sup>H NMR (500 MHz, DMSO-d<sub>6</sub>)  $\delta$  8.44 (d, J = 123.3 Hz, 4H), 1.77 (tt, J = 8.3, 5.1 Hz, 1H), 1.11 (dddd, J = 13.8, 11.4, 8.7, 4.2 Hz, 4H). Elemental analysis (%) calcd. for C<sub>4</sub>H<sub>9</sub>N<sub>7</sub> (155.18): C, 30.96; H, 5.85; N, 63.19; found: C, 31.22; H, 5.52; N, 63.26.

**Benzamidine pentazolate (4):** Dispersed 1.05 mmol of pentazolate silver salt in a mixed solution of methanol and water in a ratio of 9:1. Added 1.00 mmol of methanol solution of methylamine hydrochloride to the above mixed solution. The reaction was stirred at room temperature for 6 hours under dark conditions. Filtered to remove silver chloride precipitate, and dried the filtrate under reduced pressure to obtain a white solid. Yield: 172.1 mg (0.90 mmol, 90%). Td (onset): 113 °C. IR:  $\tilde{\nu} = 3077, 2024, 1677, 1603, 1523, 1471, 1219, 1086, 782, 683, 510 \text{ cm}^{-1}$ . Raman:  $\tilde{\nu} = 3075, 1608, 1532, 1483, 1179, 1032, 995, 766 \text{ cm}^{-1}$ .  $m/z$  (ESI<sup>+</sup>-MS): 120.93 [M-N<sub>5</sub>]<sup>+</sup>. IS: >40 J. FS: >360 N. <sup>1</sup>H NMR (500 MHz, DMSO-d<sub>6</sub>)  $\delta$  9.08 (s, 4H), 7.84 – 7.78 (m, 2H), 7.78 – 7.70 (m, 1H), 7.63 (t, J = 7.8 Hz, 2H). Elemental analysis (%) calcd. for C<sub>7</sub>H<sub>9</sub>N<sub>7</sub> (191.21): C, 43.97; H, 4.75; N, 51.28; found: C, 43.64; H, 4.59; N, 51.77.

**1H-1,2,4-triazole-1-carboxamidine pentazolate (5):** Dispersed 1.05 mmol of pentazolate silver salt in a mixed solution of methanol and water in a ratio of 9:1. Added 1.00 mmol of methanol solution of methylamine hydrochloride to the above mixed solution. The reaction was stirred at room temperature for 6 hours under dark conditions. Filtered to remove silver chloride precipitate, and dried the filtrate under reduced pressure to obtain a white solid. Yield: 167.6 mg (0.92 mmol, 92%). Td (onset): 112 °C. IR:  $\tilde{\nu} = 3384, 3120, 1718, 1657, 1532, 1394, 1282, 1223, 1132, 1095, 977, 872, 730, 659, 523, 461 \text{ cm}^{-1}$ . Raman:  $\tilde{\nu} = 3131, 1541, 1398, 1351, 1285, 1181, 1134, 1100, 977, 692, 465 \text{ cm}^{-1}$ .  $m/z$  (ESI<sup>+</sup>-MS): 111.84 [M-N<sub>5</sub>]<sup>+</sup>. IS: >40 J. FS: >360 N. <sup>1</sup>H NMR (500 MHz, DMSO-d<sub>6</sub>)  $\delta$  9.68 (s, 4H), 9.36 (dd, J = 5.9, 2.3 Hz, 1H), 8.59 – 8.46 (m, 1H). Elemental analysis (%) calcd. for C<sub>3</sub>H<sub>8</sub>N<sub>10</sub>O (200.19): C, 18.00; H, 4.03; N, 69.98; O, 7.99; found: C, 18.33; H, 4.15;



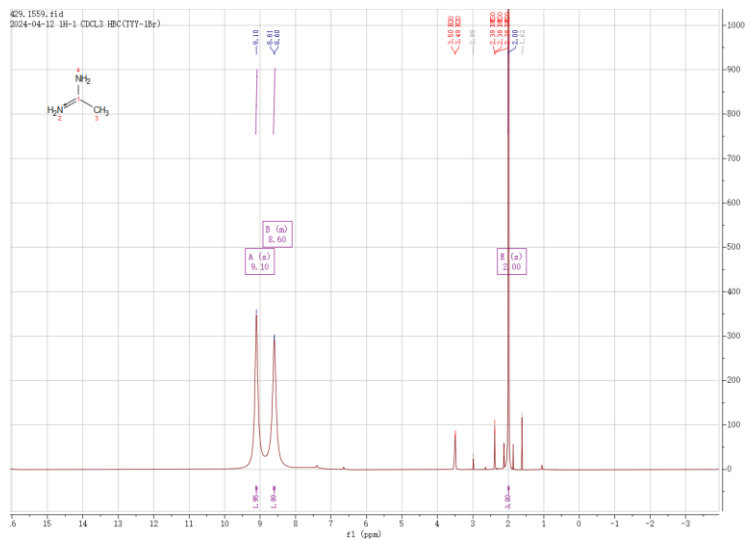

Figure S3.  $^1\text{H}$  NMR analysis of compound 1

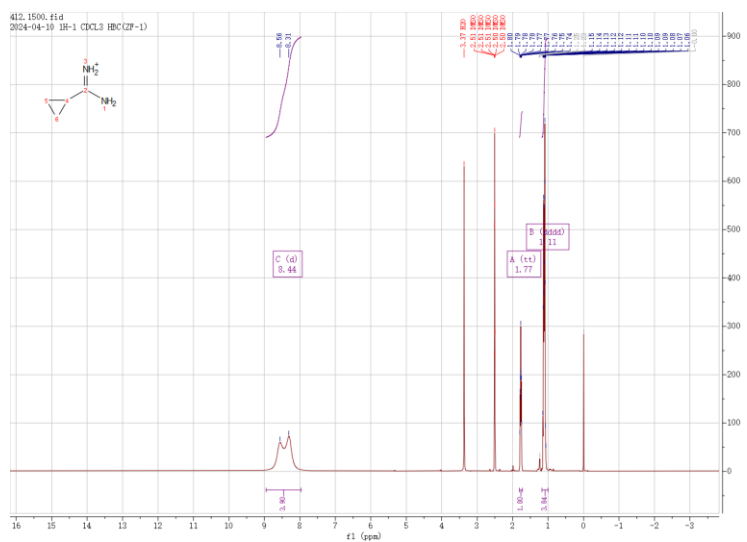

Figure S4.  $^1\text{H}$  NMR analysis of compound 3

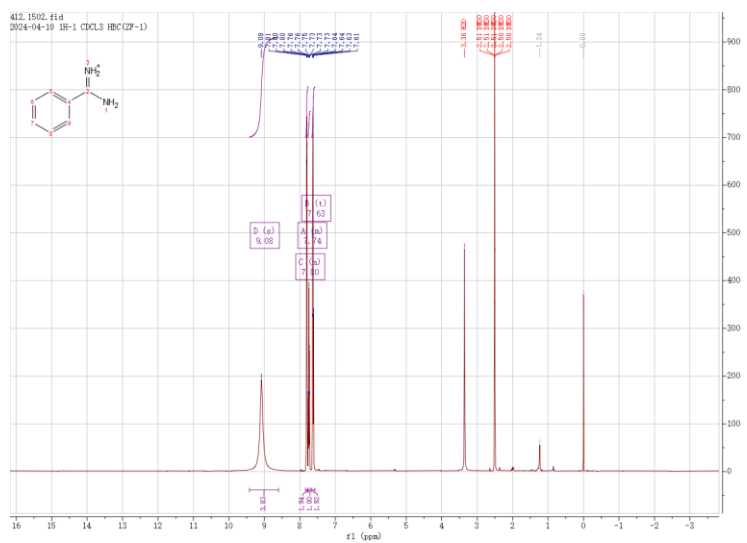

Figure S5.  $^1\text{H}$  NMR analysis of compound 4

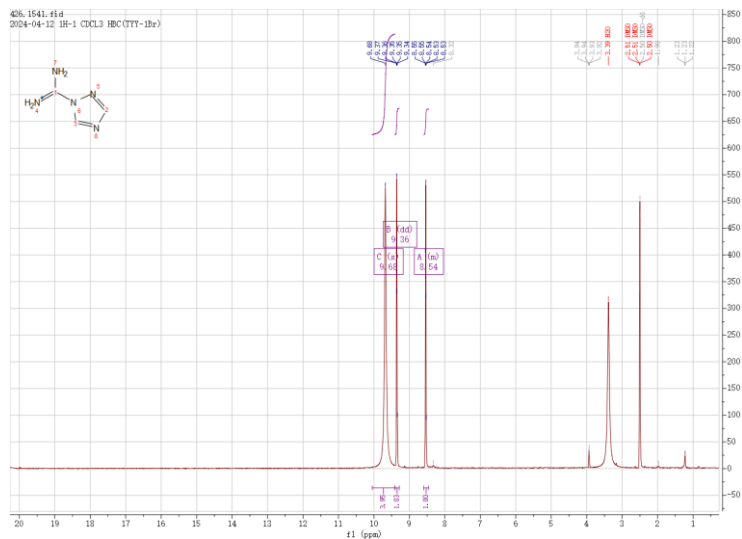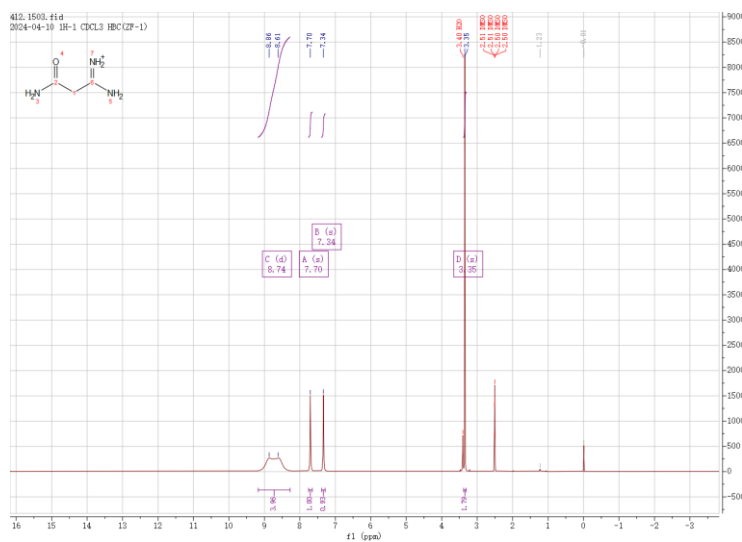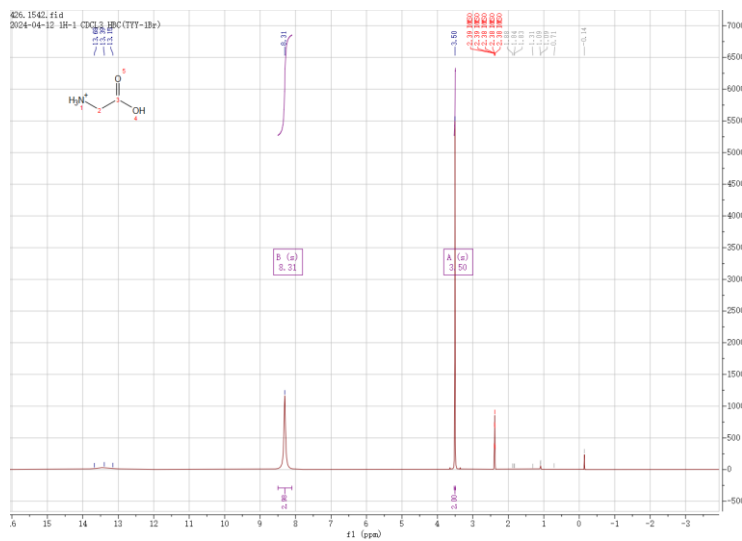

### 3. Crystal structure data

Table S1. Crystal data and structure refinement for 1-4

| Crystal                                   | 1                                                             | 2                                                             | 3                                                           | 4                                                             |
|-------------------------------------------|---------------------------------------------------------------|---------------------------------------------------------------|-------------------------------------------------------------|---------------------------------------------------------------|
| CCDC number                               | 2322435                                                       | 2322436                                                       | 2322437                                                     | 2322438                                                       |
| Empirical formula                         | CH <sub>5</sub> N <sub>7</sub>                                | C <sub>2</sub> H <sub>7</sub> N <sub>7</sub>                  | C <sub>4</sub> H <sub>9</sub> N <sub>7</sub>                | C <sub>7</sub> H <sub>9</sub> N <sub>7</sub>                  |
| Formula weight                            | 115.12                                                        | 129.125                                                       | 155.163                                                     | 191.21                                                        |
| Temperature [K]                           | 296(2)                                                        | 273.15                                                        | 273.15                                                      | 296(2)                                                        |
| Crystal system                            | monoclinic                                                    | orthorhombi<br>c                                              | monoclinic                                                  | triclinic                                                     |
| Space group (number)                      | <i>C2/c</i> (15)                                              | <i>Pnma</i> (62)                                              | <i>P2<sub>1</sub>/m</i> (11)                                | <i>P<math>\bar{1}</math></i> (2)                              |
| <i>a</i> [Å]                              | 4.9752(6)                                                     | 13.629(1)                                                     | 7.0037(15)                                                  | 3.9161(5)                                                     |
| <i>b</i> [Å]                              | 15.7038(18)                                                   | 6.5997(6)                                                     | 7.0175(15)                                                  | 9.7152(11)                                                    |
| <i>c</i> [Å]                              | 7.0385(10)                                                    | 7.4672(5)                                                     | 7.7191(16)                                                  | 12.5718(14)                                                   |
| $\alpha$ [°]                              | 90                                                            | 90                                                            | 90                                                          | 84.813(3)                                                     |
| $\beta$ [°]                               | 107.756(4)                                                    | 90                                                            | 96.937(7)                                                   | 86.135(4)                                                     |
| $\gamma$ [°]                              | 90                                                            | 90                                                            | 90                                                          | 83.993(4)                                                     |
| Volume [Å <sup>3</sup> ]                  | 523.72(12)                                                    | 671.65(9)                                                     | 376.60(14)                                                  | 472.92(10)                                                    |
| <i>Z</i>                                  | 4                                                             | 4                                                             | 2                                                           | 2                                                             |
| $\rho_{\text{calc}}$ [gcm <sup>-3</sup> ] | 1.460                                                         | 1.277                                                         | 1.368                                                       | 1.343                                                         |
| $\mu$ [mm <sup>-1</sup> ]                 | 0.116                                                         | 0.098                                                         | 0.100                                                       | 0.094                                                         |
| <i>F</i> (000)                            | 240                                                           | 272.210                                                       | 164.119                                                     | 200                                                           |
| Crystal size [mm <sup>3</sup> ]           | 0.180×0.170×0.1<br>60                                         | 0.22×0.2×0.<br>19                                             | 0.4×0.2×0.2                                                 | 0.200×0.030×0.0<br>10                                         |
| Crystal colour                            | colourless                                                    | colourless                                                    | colourless                                                  | colourless                                                    |
| Crystal shape                             | block                                                         | plate                                                         | block                                                       | needle                                                        |
| Radiation                                 | MoK $\alpha$<br>( $\lambda=0.71073$ Å)                        | Mo K $\alpha$<br>( $\lambda=0.71073$<br>Å)                    | Mo K $\alpha$<br>( $\lambda=0.71073$<br>Å)                  | MoK $\alpha$<br>( $\lambda=0.71073$ Å)                        |
| 2 $\theta$ range [°]                      | 5.19 to 54.86<br>(0.77 Å)                                     | 6.22 to 54.90<br>(0.77 Å)                                     | 5.32 to 50.12<br>(0.84 Å)                                   | 4.23 to 55.13<br>(0.77 Å)                                     |
| Index ranges                              | -6 ≤ <i>h</i> ≤ 5<br>-20 ≤ <i>k</i> ≤ 20<br>-8 ≤ <i>l</i> ≤ 9 | -14 ≤ <i>h</i> ≤ 17<br>-8 ≤ <i>k</i> ≤ 8<br>-8 ≤ <i>l</i> ≤ 9 | -8 ≤ <i>h</i> ≤ 7<br>-8 ≤ <i>k</i> ≤ 8<br>-8 ≤ <i>l</i> ≤ 9 | -5 ≤ <i>h</i> ≤ 5<br>-12 ≤ <i>k</i> ≤ 12<br>0 ≤ <i>l</i> ≤ 16 |
| Reflections collected                     | 2234<br>596<br>Rint = 0.0258                                  | 5669<br>836<br>Rint =                                         | 5041<br>727<br>Rint =                                       | 2115<br>2115<br>Rint = ?                                      |
| Independent reflections                   | Rsigma = 0.0253                                               | 0.0333<br>Rsigma =<br>0.0244                                  | 0.1434<br>Rsigma =<br>0.0714                                | Rsigma = 0.0510                                               |
| Completeness to $\theta$ =<br>22.734°     | 98.3 %                                                        | 99.6 %                                                        | 99.3 %                                                      | 97.7 %                                                        |
| Data/Restraints/Parameters                | 596/0/38                                                      | 836/0/62                                                      | 727/1/87                                                    | 2115/0/128                                                    |



|                                                |                             |                                |                                |                             |
|------------------------------------------------|-----------------------------|--------------------------------|--------------------------------|-----------------------------|
| Goodness-of-fit on $F^2$                       | 1.090                       | 1.0424                         | 1.0564                         | 1.043                       |
| Final $R$ indexes<br>[ $I \geq 2\sigma(I)$ ]   | R1 = 0.0341<br>wR2 = 0.0805 | R1 = 0.0444<br>wR2 =<br>0.1078 | R1 = 0.0580<br>wR2 =<br>0.1201 | R1 = 0.0547<br>wR2 = 0.1222 |
| Final $R$ indexes<br>[all data]                | R1 = 0.0453<br>wR2 = 0.0855 | R1 = 0.0687<br>wR2 =<br>0.1230 | R1 = 0.0881<br>wR2 =<br>0.1406 | R1 = 0.0969<br>wR2 = 0.1373 |
| Largest<br>peak/hole<br>[ $e\text{\AA}^{-3}$ ] | 0.16/-0.13                  | 0.22/-0.22                     | 0.35/-0.37                     | 0.17/-0.17                  |

Table S2. Crystal data and structure refinement for 5-7

| Crystal                                   | 5                                                                  | 6                                                                  | 7                                                              |
|-------------------------------------------|--------------------------------------------------------------------|--------------------------------------------------------------------|----------------------------------------------------------------|
| CCDC number                               | 2322439                                                            | 2322440                                                            | 2322441                                                        |
| Empirical formula                         | $C_3H_8N_{10}O$                                                    | $C_3H_8N_8O$                                                       | $C_2H_6N_6O_2$                                                 |
| Formula weight                            | 200.19                                                             | 172.17                                                             | 146.13                                                         |
| Temperature [K]                           | 273.15                                                             | 273.15                                                             | 273.15                                                         |
| Crystal system                            | monoclinic                                                         | monoclinic                                                         | triclinic                                                      |
| Space group (number)                      | $P2_1/c$ (14)                                                      | $P2_1/c$ (14)                                                      | $P\bar{1}$ (2)                                                 |
| $a$ [Å]                                   | 6.450(5)                                                           | 4.8465(4)                                                          | 5.2112(15)                                                     |
| $b$ [Å]                                   | 12.008(10)                                                         | 9.6906(7)                                                          | 7.849(2)                                                       |
| $c$ [Å]                                   | 12.141(11)                                                         | 16.5974(12)                                                        | 7.880(3)                                                       |
| $\alpha$ [°]                              | 90                                                                 | 90                                                                 | 78.116(9)                                                      |
| $\beta$ [°]                               | 102.19(3)                                                          | 92.765(2)                                                          | 76.103(10)                                                     |
| $\gamma$ [°]                              | 90                                                                 | 90                                                                 | 73.730(9)                                                      |
| Volume [Å <sup>3</sup> ]                  | 919.0(13)                                                          | 778.60(10)                                                         | 297.01(16)                                                     |
| $Z$                                       | 4                                                                  | 4                                                                  | 2                                                              |
| $\rho_{\text{calc}}$ [gcm <sup>-3</sup> ] | 1.447                                                              | 1.469                                                              | 1.634                                                          |
| $\mu$ [mm <sup>-1</sup> ]                 | 0.117                                                              | 0.118                                                              | 0.141                                                          |
| $F(000)$                                  | 416                                                                | 360                                                                | 152                                                            |
| Crystal size [mm <sup>3</sup> ]           | 0.18×0.12×0.11                                                     | 0.13×0.12×0.11                                                     | 0.3×0.2×0.2                                                    |
| Crystal colour                            | light colourless                                                   | colourless                                                         | colourless                                                     |
| Crystal shape                             | block                                                              | block                                                              | block                                                          |
| Radiation                                 | $\text{MoK}\alpha$<br>( $\lambda=0.71073$ Å)                       | $\text{MoK}\alpha$<br>( $\lambda=0.71073$ Å)                       | $\text{MoK}\alpha$<br>( $\lambda=0.71073$ Å)                   |
| 2 $\theta$ range [°]                      | 4.83 to 48.60<br>(0.86 Å)                                          | 4.87 to 50.05<br>(0.84 Å)                                          | 5.39 to 49.98<br>(0.84 Å)                                      |
| Index ranges                              | $-7 \leq h \leq 6$<br>$-13 \leq k \leq 12$<br>$-10 \leq l \leq 14$ | $-5 \leq h \leq 5$<br>$-10 \leq k \leq 11$<br>$-19 \leq l \leq 19$ | $-6 \leq h \leq 6$<br>$-9 \leq k \leq 9$<br>$-9 \leq l \leq 9$ |
| Reflections collected                     | 3729<br>1478                                                       | 6507<br>1376                                                       | 2455<br>1030                                                   |
| Independent reflections                   | $R_{\text{int}} = 0.0800$<br>$R_{\text{sigma}} = 0.1197$           | $R_{\text{int}} = 0.0541$<br>$R_{\text{sigma}} = 0.0461$           | $R_{\text{int}} = 0.0265$<br>$R_{\text{sigma}} = 0.0327$       |
| Completeness to                           | 98.7 %                                                             | 99.9 %                                                             | 97.7 %                                                         |

$\theta = 24.302^\circ$

|                                             |                 |                 |                 |
|---------------------------------------------|-----------------|-----------------|-----------------|
| Data/ Restraints / Parameters               | 1478/0/130      | 1376/0/109      | 1030/0/115      |
| Goodness-of-fit on $F^2$                    | 1.034           | 1.040           | 1.080           |
| Final $R$ indexes                           | $R_1 = 0.0625$  | $R_1 = 0.0404$  | $R_1 = 0.0315$  |
| $[I \geq 2\sigma(I)]$                       | $wR_2 = 0.1120$ | $wR_2 = 0.0929$ | $wR_2 = 0.0833$ |
| Final $R$ indexes                           | $R_1 = 0.1410$  | $R_1 = 0.0573$  | $R_1 = 0.0346$  |
| [all data]                                  | $wR_2 = 0.1341$ | $wR_2 = 0.1013$ | $wR_2 = 0.0855$ |
| Largest peak/hole<br>[ $e\text{\AA}^{-3}$ ] | 0.21/-0.28      | 0.23/-0.26      | 0.20/-0.16      |

Tab S3. Bond length of pentazole formamidine

| Parameter | Bond length( $\text{\AA}$ ) | Parameter | Bond length( $\text{\AA}$ ) |
|-----------|-----------------------------|-----------|-----------------------------|
| N1-N2     | 1.318(3)                    | N3-N3     | 1.323(4)                    |
| N2-N3     | 1.312(4)                    | N4-C1     | 1.294(3)                    |

Tab S4. Bond angle of pentazole formamidine

| Parameter | Bond angle(o) | Parameter | Bond angle(o) |
|-----------|---------------|-----------|---------------|
| N2-N1-N2  | 108.2(3)      | N2-N3-N3  | 108.1(13)     |
| N3-N2-N1  | 107.8(2)      | N4-C1-N4  | 125.2(5)      |

Table S5. Torsion angle of pentazole formamidine

| Parameter   | Torsion angle( $^\circ$ ) | Parameter   | Torsion angle( $^\circ$ ) |
|-------------|---------------------------|-------------|---------------------------|
| N1-N2-N3-N3 | -0.8(3)                   | N2-N1-N2-N3 | -0.32(12)                 |

Table S6. Bond length of pentazole acetamidine

| Parameter | Bond length( $\text{\AA}$ ) | Parameter | Bond length( $\text{\AA}$ ) |
|-----------|-----------------------------|-----------|-----------------------------|
| N1-N5     | 1.302(4)                    | N4-N5     | 1.306(4)                    |
| N1-N2     | 1.313(4)                    | N6-C2     | 1.296(4)                    |
| N2-N3     | 1.297(4)                    | C1-C2     | 1.486(5)                    |
| N3-N4     | 1.313(4)                    | C2-N7     | 1.295(4)                    |

Table S7. Bond angle of pentazole acetamidine

| Parameter | Bond angle(o) | Parameter | Bond angle(o) |
|-----------|---------------|-----------|---------------|
| N5-N1-N2  | 108.4(2)      | N1-N5-N4  | 107.6(2)      |
| N3-N2-N1  | 107.8(3)      | N7-C2-N6  | 121.7(3)      |
| N2-N3-N4  | 108.1(3)      | N7-C2-C1  | 119.5(3)      |
| N5-N4-N3  | 108.1(3)      | N6-C2-C1  | 118.8(3)      |

Table S8. Torsion angle of pentazole acetamidine

| Parameter | Torsion angle( $^\circ$ ) | Parameter | Torsion angle( $^\circ$ ) |
|-----------|---------------------------|-----------|---------------------------|
|-----------|---------------------------|-----------|---------------------------|

|             |           |             |           |
|-------------|-----------|-------------|-----------|
| N4-N3-N2-N1 | -0.14(2)  | C1-C2-N6-N7 | 178.95(3) |
| N3-N4-N5-N1 | -0.10(2)  | N6-N7-C1-C2 | 178.92(3) |
| N6-C3-C2-N7 | 178.95(3) | N5-N4-N3-N2 | 0.12(2)   |
| N2-N1-N5-N4 | 0.00(2)   | N5-N1-N2-N3 | 0.10(2)   |

Table S9. Bond length of pentazole cyclopropane-1-carboxi-midamide

| Parameter | Bond length(Å) | Parameter | Bond length(Å) |
|-----------|----------------|-----------|----------------|
| N1-N2     | 1.302(4)       | N7-C1     | 1.304(4)       |
| N1-N5     | 1.305(4)       | C1-C2     | 1.456(5)       |
| N2-N3     | 1.314(4)       | C2-C3     | 1.505(3)       |
| N3-N4     | 1.312(4)       | C2-C3     | 1.505(3)       |
| N4-N5     | 1.309(4)       | C3-C3     | 1.470(5)       |
| N6-C1     | 1.316(4)       |           |                |

Table S10. Bond angle of pentazole cyclopropane-1-carboxi-midamide

| Parameter | Bond angle(°) | Parameter | Bond angle(°) |
|-----------|---------------|-----------|---------------|
| N2-N1-N5  | 108.6(3)      | N7-C1-C2  | 118.7(3)      |
| N1-N2-N3  | 107.5(3)      | N6-C1-C2  | 121.0(3)      |
| N4-N3-N2  | 108.3(3)      | C1-C2-C3  | 120.3(2)      |
| N5-N4-N3  | 107.4(3)      | C1-C2-C3  | 120.3(2)      |
| N1-N5-N4  | 108.2(3)      | C3-C2-C3  | 58.5(2)       |
| N7-C1-N6  | 120.3(3)      | C3-C3-C2  | 60.76(11)     |

Table S11. Torsion angle of pentazole cyclopropane-1-carboxi-midamide

| Parameter   | Torsion angle(°) | Parameter   | Torsion angle(°) |
|-------------|------------------|-------------|------------------|
| N4-N3-N2-N1 | -0.14(11)        | C3-C3-C2-C1 | -109.10(11)      |
| N3-N4-N5-N1 | -0.1(3)          | C1-C2-N7-N6 | 180.00(4)        |
| N6-C2-C2-C3 | 34.46(11)        | N5-N4-N3-N2 | 0.12(2)          |
| N2-N1-N5-N4 | 0.00(2)          | N5-N1-N2-N3 | 0.10(2)          |
| N7-C1-C2-C3 | -145.54(11)      | C3-C3-N6-N7 | 89.40(11)        |

Table S12. Bond length of pentazole Benzamidine

| Parameter | Bond length(Å) | Parameter | Bond length(Å) |
|-----------|----------------|-----------|----------------|
| N1-N5     | 1.318(6)       | C1-C2     | 1.470(7)       |
| N1-N2     | 1.330(6)       | C2-C3     | 1.383(7)       |
| N2-N3     | 1.322(7)       | C2-C7     | 1.392(7)       |
| N3-N4     | 1.302(6)       | C3-C4     | 1.391(8)       |
| N4-N5     | 1.317(6)       | C4-C5     | 1.350(9)       |
| N6-C1     | 1.295(6)       | C5-C6     | 1.363(8)       |
| N7-C1     | 1.311(6)       | C6-C7     | 1.372(8)       |

Table S13. Bond angle of pentazole Benzamidine

| Parameter | Bond angle(°) | Parameter | Bond angle(°) |
|-----------|---------------|-----------|---------------|
| N5-N1-N2  | 107.4(4)      | C3-C2-C7  | 119.3(5)      |
| N3-N2-N1  | 107.9(4)      | C3-C2-C1  | 120.1(5)      |
| N4-N3-N2  | 107.9(4)      | C7-C2-C1  | 120.6(5)      |
| N3-N4-N5  | 108.9(4)      | C2-C3-C4  | 118.5(6)      |
| N4-N5-N1  | 108.0(4)      | C5-C4-C3  | 121.5(6)      |
| N6-C1-N7  | 121.8(5)      | C4-C5-C6  | 120.2(6)      |
| N6-C1-C2  | 119.5(4)      | C5-C6-C7  | 120.0(6)      |
| N7-C1-C2  | 118.7(4)      | C6-C7-C2  | 120.4(5)      |

Table S14. Bond length of pentazole 1H-1,2,4-triazole-1-carboxamidine

| Parameter | Bond length(Å) | Parameter | Bond length(Å) |
|-----------|----------------|-----------|----------------|
| N1-N5     | 1.311(3)       | N4-N5     | 1.321(2)       |
| N1-N2     | 1.313(2)       | N6-C2     | 1.357(2)       |
| N2-N3     | 1.313(2)       | N7-C1     | 1.309(2)       |
| N3-N4     | 1.314(2)       | C1-N8     | 1.299(2)       |

Table S15. Bond angle of pentazole 1H-1,2,4-triazole-1-carboxamidine

| Parameter | Bond angle(°) | Parameter | Bond angle(°) |
|-----------|---------------|-----------|---------------|
| N5-N1-N2  | 108.14(16)    | N1-N5-N4  | 108.17(16)    |
| N3-N2-N1  | 107.85(16)    | N7-C1-N6  | 118.06(16)    |
| N2-N3-N4  | 108.43(15)    | N10-C2-N6 | 110.14(17)    |
| N5-N4-N3  | 107.42(16)    | N9-C3-N10 | 115.20(19)    |

Table S16. Torsion angle of pentazole 1H-1,2,4-triazole-1-carboxamidine

| Parameter    | Torsion angle(°) | Parameter    | Torsion angle(°) |
|--------------|------------------|--------------|------------------|
| N4-N3-N2-N1  | 0.00(2)          | C3-N10-C2-N6 | -0.10(2)         |
| N3-N4-N5-N1  | 0.10(2)          | C2-N6-N9-C3  | 0.70(2)          |
| C1-N6-N9-C3  | 177.40(16)       | C2-N6-C1-N7  | -15.40(3)        |
| N2-N1-N5-N4  | -0.10(2)         | C2-N6-C1-N8  | 164.97(18)       |
| C1-N6-C2-N10 | -176.52(17)      | C2-N10-C3-N9 | 0.70(3)          |

Table S17. Bond length of pentazole 3-amino-3-iminopropanamide

| Parameter | Bond length(Å) | Parameter | Bond length(Å) |
|-----------|----------------|-----------|----------------|
| O1-C1     | 1.229(2)       | N8-C3     | 1.298(2)       |
| N4-N3     | 1.306(2)       | N7-C3     | 1.309(2)       |
| N4-N5     | 1.324(2)       | C3-C2     | 1.496(2)       |
| N1-N2     | 1.311(2)       | N6-C1     | 1.321(2)       |
| N1-N5     | 1.309(2)       | C2-C1     | 1.521(2)       |
| N3-N2     | 1.328(2)       |           |                |

Table S18. Bond angle of pentazole 3-amino-3-iminopropanamide

| Parameter | Bond angle(°) | Parameter | Bond angle(°) |
|-----------|---------------|-----------|---------------|
| N3-N4-N5  | 107.92(15)    | N7-C3-C2  | 117.75(15)    |
| N5-N1-N2  | 108.52(15)    | N1-N5-N4  | 107.90(14)    |
| N4-N3-N2  | 108.18(14)    | C3-C2-C1  | 111.26(13)    |
| N1-N2-N3  | 107.48(14)    | O1-C1-N6  | 123.89(16)    |
| N8-C3-N7  | 121.89(16)    | O1-C1-C2  | 120.31(15)    |
| N8-C3-C2  | 120.36(15)    | N6-C1-C2  | 115.75(15)    |

Table S19. Torsion angle of pentazole 3-amino-3-iminopropanamide

| Parameter   | Torsion angle(°) | Parameter   | Torsion angle(°) |
|-------------|------------------|-------------|------------------|
| N4-N3-N2-N1 | -0.14(19)        | C3-C2-C1-O1 | -34.60(2)        |
| N3-N4-N5-N1 | -0.10(2)         | C3-C2-C1-N6 | 147.71(15)       |
| N8-C3-C2-C1 | 113.56(17)       | N5-N4-N3-N2 | 0.12(19)         |
| N2-N1-N5-N4 | 0.00(2)          | N5-N1-N2-N3 | 0.10(2)          |
| N7-C3-C2-C1 | -67.14(19)       |             |                  |

Table S20. Bond length of pentazole glycine

| Parameter | Bond length(Å) | Parameter | Bond length(Å) |
|-----------|----------------|-----------|----------------|
| O1-C2     | 1.210(18)      | N1-N2     | 1.315(17)      |
| C1-C2     | 1.510(18)      | N4-N5     | 1.311(18)      |
| C1-N6     | 1.469(18)      | N3-N2     | 1.309(17)      |
| C2-O2     | 1.314(16)      | N3-N4     | 1.315(17)      |
| N1-N5     | 1.310(17)      |           |                |

Table S21. Bond angle of pentazole glycine

| Parameter | Bond angle(°) | Parameter | Bond angle(°) |
|-----------|---------------|-----------|---------------|
| N2-N3-N4  | 108.25(11)    | O2-C2-C1  | 116.51(11)    |
| N5-N4-N3  | 107.83(11)    | O1-C2-O2  | 121.82(11)    |
| N5-N1-N2  | 108.24(12)    | O1-C2-C1  | 121.66(12)    |
| N3-N2-N1  | 107.68(11)    | N6-C1-C2  | 110.40(11)    |
| N1-N5-N4  | 108.00(11)    |           |               |

Table S22. Torsion angle of pentazole glycine

| Parameter   | Torsion angle(°) | Parameter   | Torsion angle(°) |
|-------------|------------------|-------------|------------------|
| N4-N3-N2-N1 | 0.04(14)         | N6-C1-C2-O1 | -1.21(17)        |
| N3-N4-N5-N1 | 0.18(15)         | N5-N4-N3-N2 | -0.15(15)        |
| N2-N3-N4-N5 | -0.14(15)        | N5-N1-N2-N3 | 0.07(15)         |
| N6-C1-C2-O2 | 177.91(11)       |             |                  |

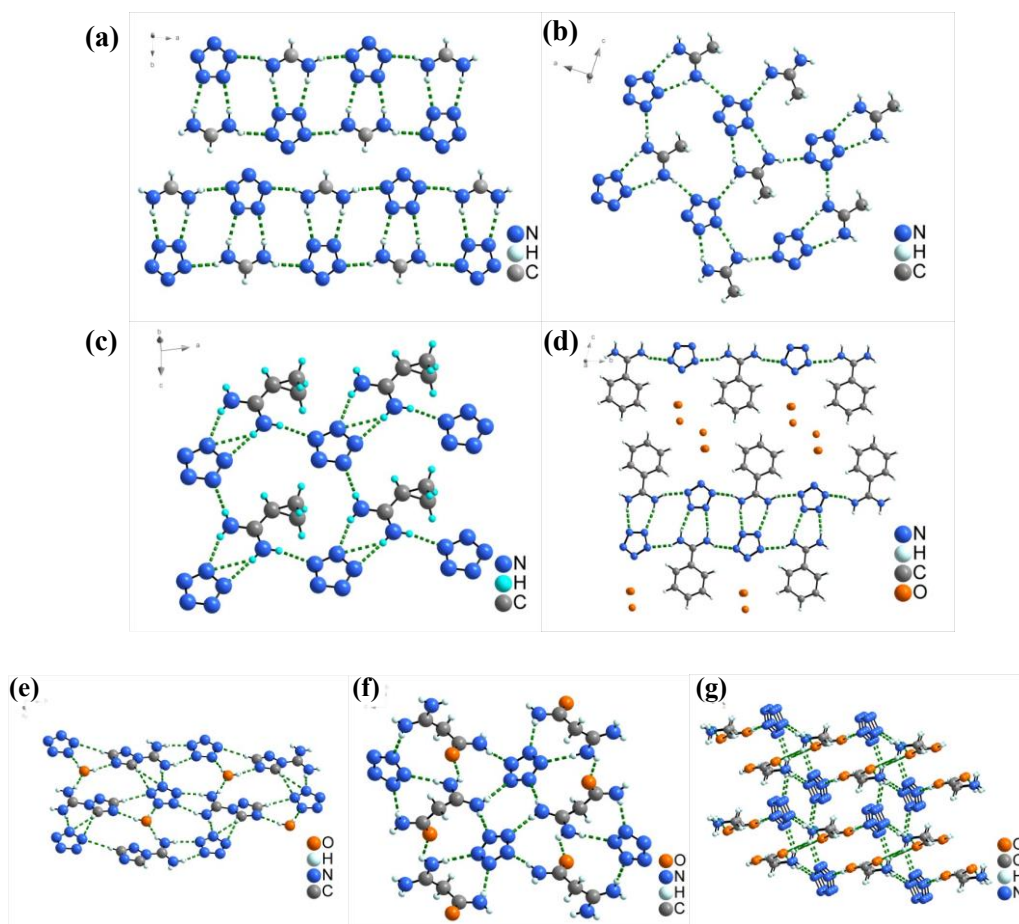

Figure S9. Intramolecular hydrogen bonds of compound 1-7

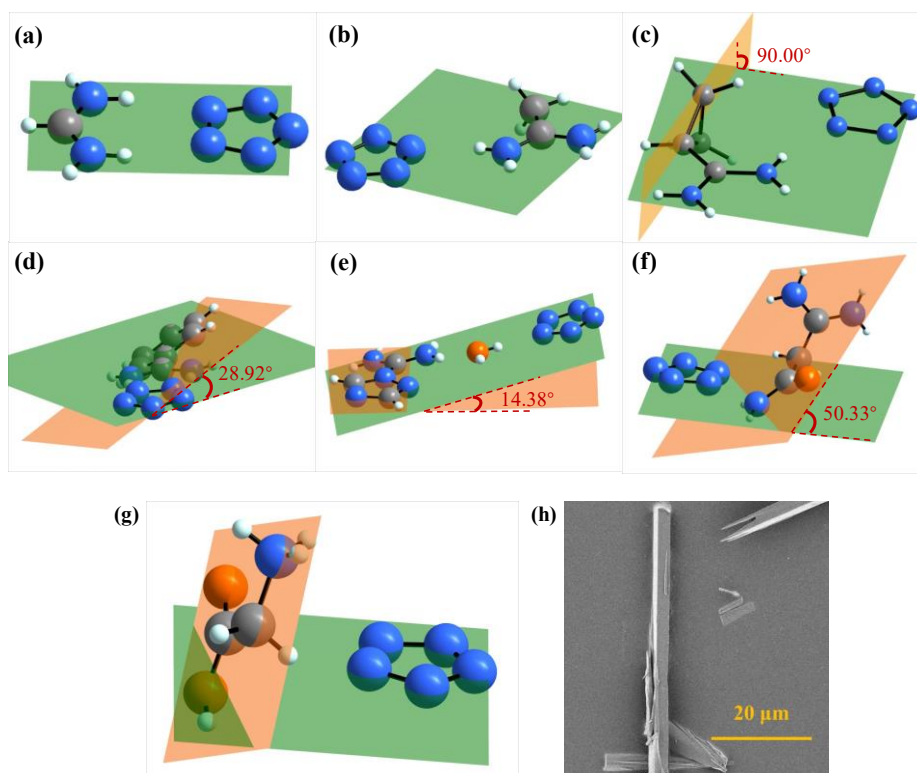

Figure S10. (a-g) Dihedral angle of compound 1-7 and (h) SEM of 7

## 4. TG analysis

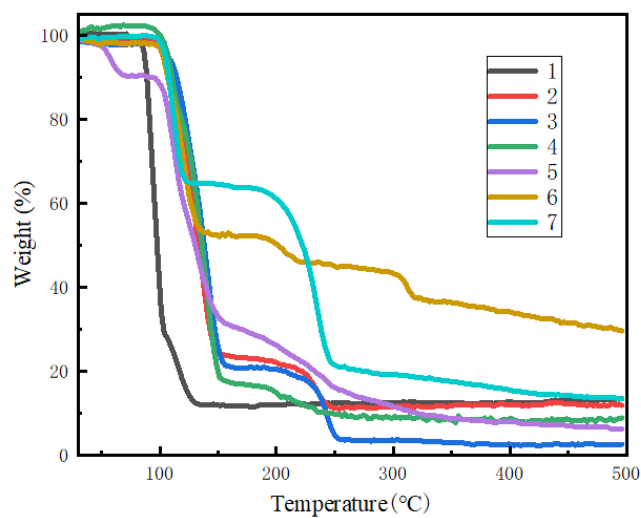

Figure S11. TG of compound 1-7

## 5. ESP and NCI analysis

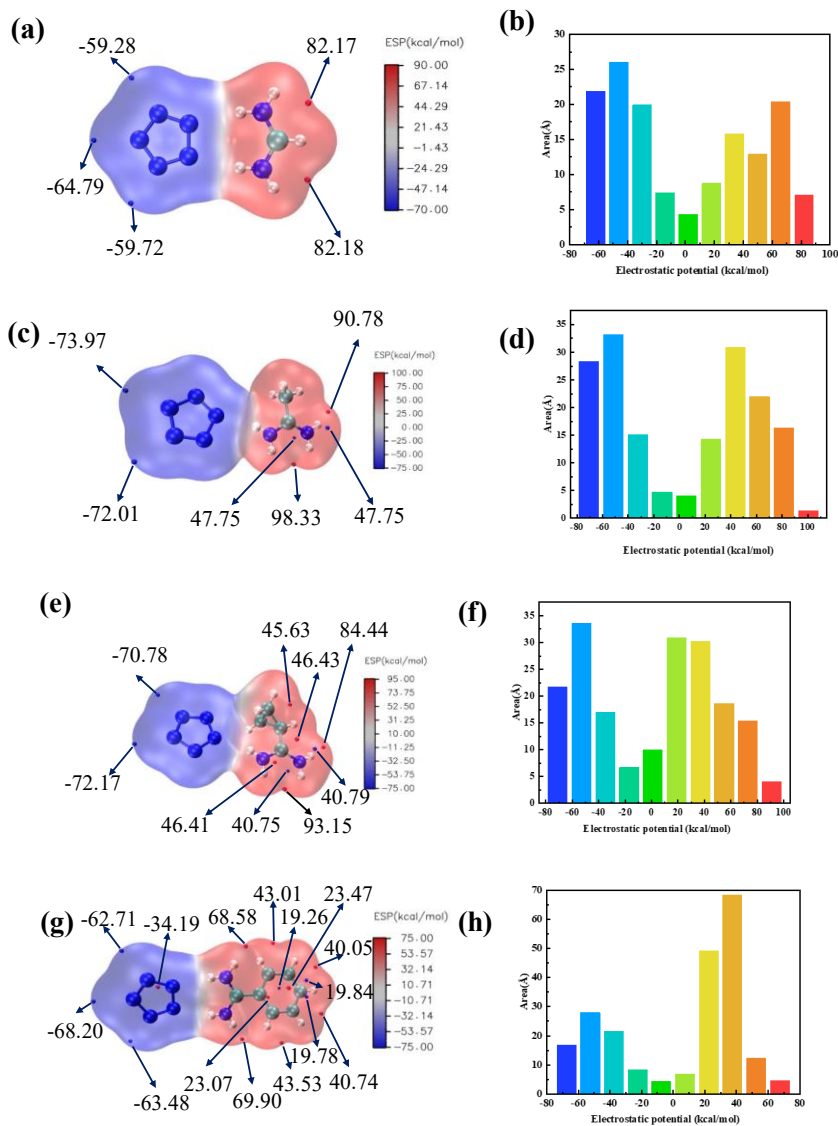

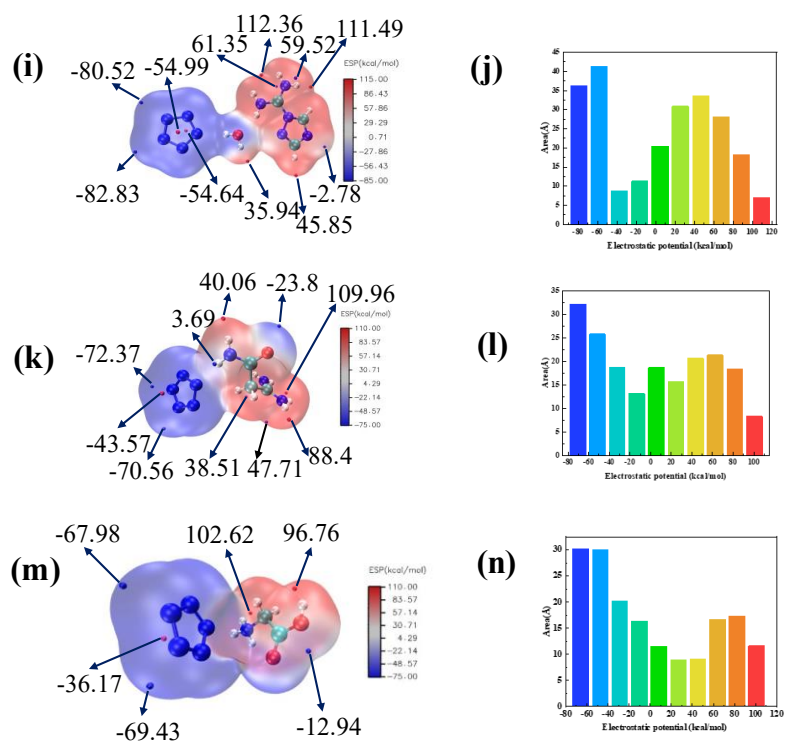

Figure S12. ESP-mapped molecular van der Waals (vdW) surfaces of the structurally optimized molecules (Surface local ESP minima and maxima are represented as blue and red spheres, respectively) and vdW surface areas for each ESP range for compound 1-7

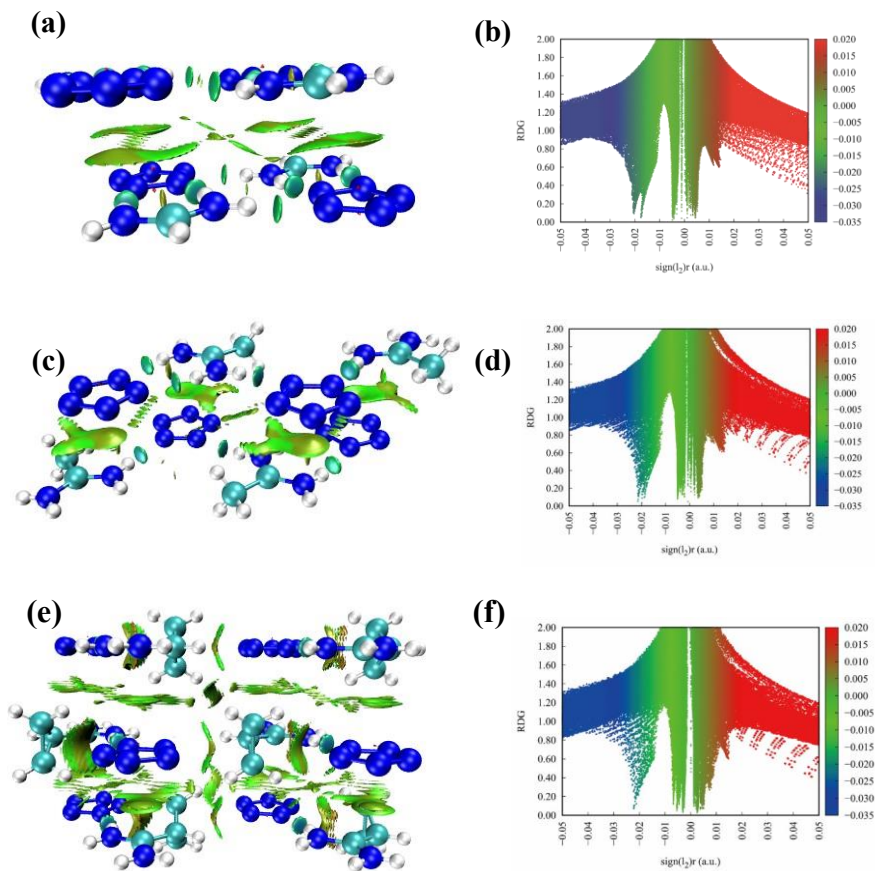



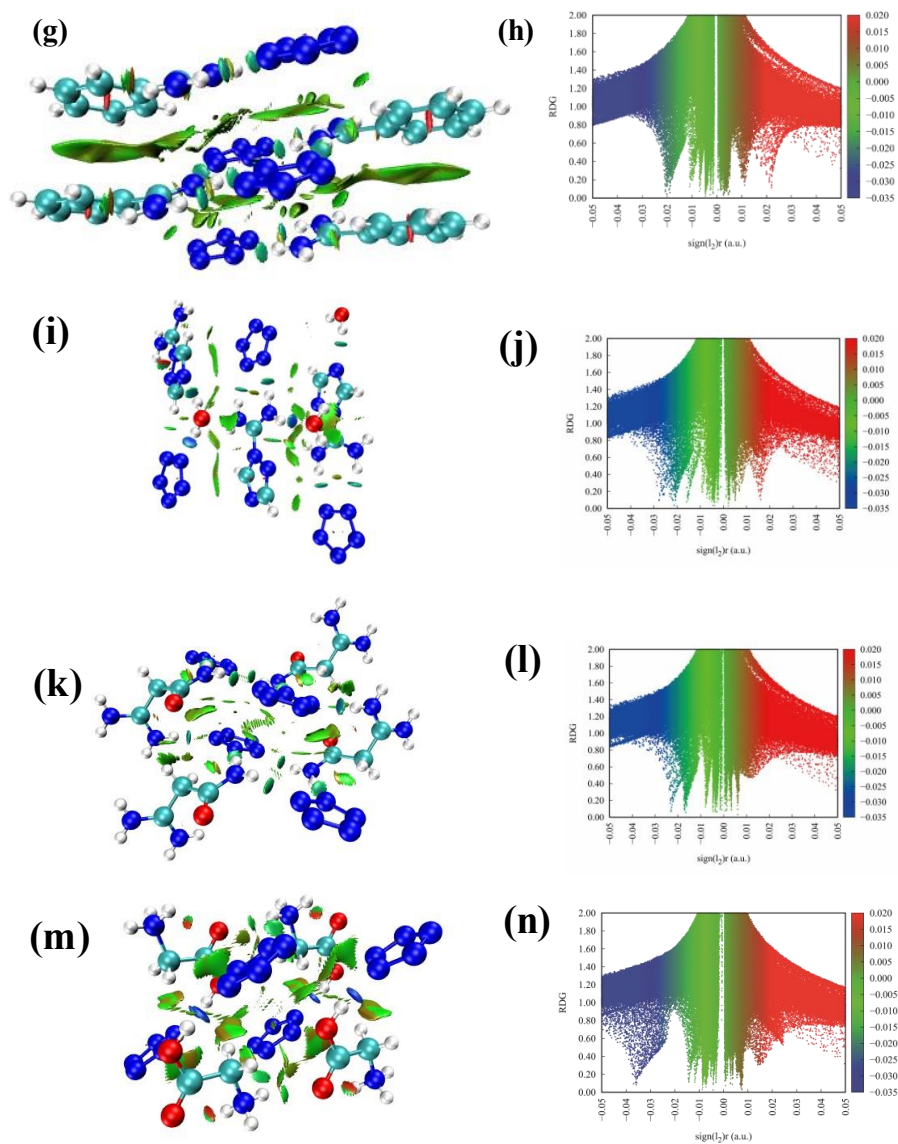

Figure S13. Noncovalent interaction analyses and scatter graphs for 1-7 (including hydrogen bonds and  $\pi$ - $\pi$  interactions, blue: strong attraction; green: weak interaction; red: strong repulsion)

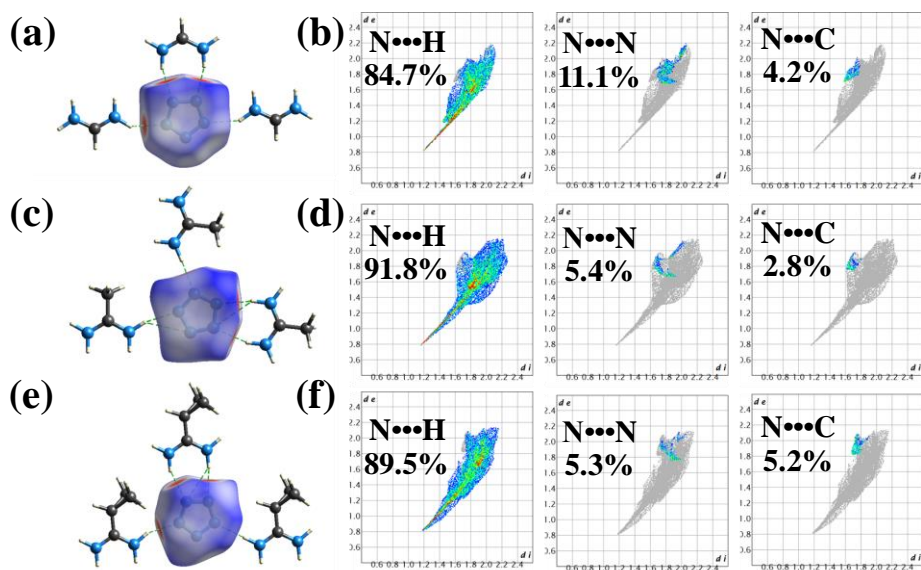

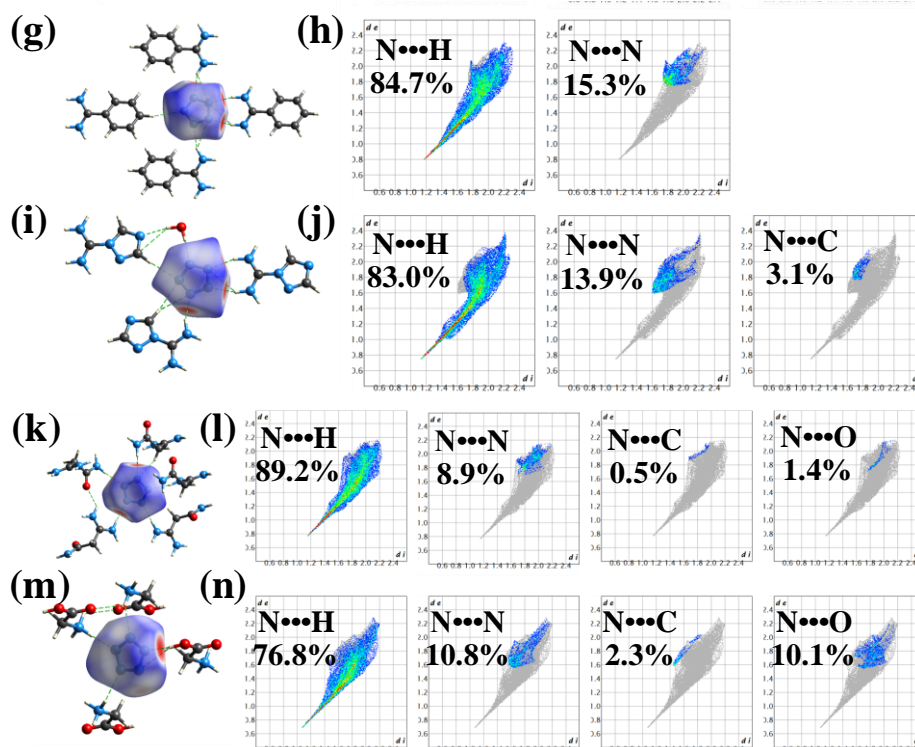

Figure S14. Hirshfeld surface and 2D fingerprint plots in crystal stacking of cyclo- $N_5^-$  of (a, b) compound 1, (c, d) compound 2, (e, f) compound 3, (g, h) compound 4, (i, j) compound 5, (k, l) compound 6, (m, n) compound 7.

## 6. Physicochemical and Energetic Properties

For energetic salts, the solid-phase heats of formation are calculated on the basis of a Born-Haber energy cycle (Scheme S1).

Based on a Born-Haber energy cycle, the heat of formation of a salt can be simplified by the formula given in Equation (1):

$$\Delta H_f(\text{salt}, 298\text{K}) = \Delta H_f(\text{cation}, 298\text{K}) + \Delta H_f(\text{anion}, 298\text{K}) - \Delta H_L \quad (1)$$

where  $\Delta H_L$  is the lattice energy of the salts, which could be predicted by using the formula suggested by Jenkins et al<sup>8-10</sup>. [Eq. (2)]

$$\Delta H_L = U_{\text{POT}} + [p(n_M/2 - 2) + q(n_X/2 - 2)]RT \quad (2)$$

where  $n_M$  and  $n_X$  depend on the nature of the ions,  $M_{p+}$  and  $X_{q-}$ , and are equal to 3 for monatomic ions, 5 for linear polyatomic ions, and 6 for nonlinear polyatomic ions.

The equation for lattice potential energy  $U_{\text{POT}}$  [Eq. (3)] has the form:

$$U_{\text{POT}} (\text{kJ}\cdot\text{mol}^{-1}) = \gamma (\rho_m/M_m)^{1/3} + \delta \quad (3)$$

Where  $\rho_m/\text{g}\cdot\text{cm}^{-3}$  is the density,  $M_m$  is the chemical formula mass of the ionic material, and values for the coefficients  $\gamma/\text{kJ}\cdot\text{mol}^{-1}\text{cm}$  and  $\delta/\text{kJ}\cdot\text{mol}^{-1}$  are taken from the literature<sup>11</sup>.

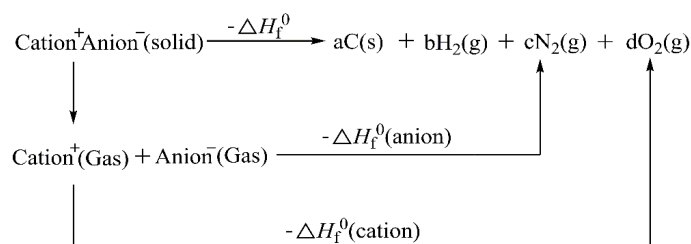

Scheme S1. Born-Haber cycle for the formation of ionic salts.

At the B3LYP/6-311+G\*\* level<sup>12-15</sup>, geometric optimization and frequency analysis were carried out for cations in all compounds, and the stable structures at the local energy minimum on the potential energy surface were obtained without imaginary frequencies. The enthalpy of formation of the cation section was calculated based on the designed isodesmic reaction. The enthalpy of formation of pentazolate anion has been reported in relevant literature<sup>16</sup>.

At 298 K, the standard heat of formation of cations can be calculated by the following equation<sup>17, 18</sup>:

$$\Delta H(\text{cation}, 298\text{K}) = \Delta E(\text{cation}, 298\text{K}) + \Delta(PV) = \Delta E_0 + \Delta ZPE + \Delta H_T + \Delta nRT$$

where  $\Delta E_0$  is the difference in total energies between the products and reactants at 0 K,  $\Delta ZPE$  is the difference in zero energy between the product and reactant at 0 K, and  $\Delta H_T$  is the temperature correction factor. As shown in **Scheme S2.**, the following is the isodesmic reactions for all the calculated cations. The heat of formation of small molecules can be found in the literature or calculated with G4.

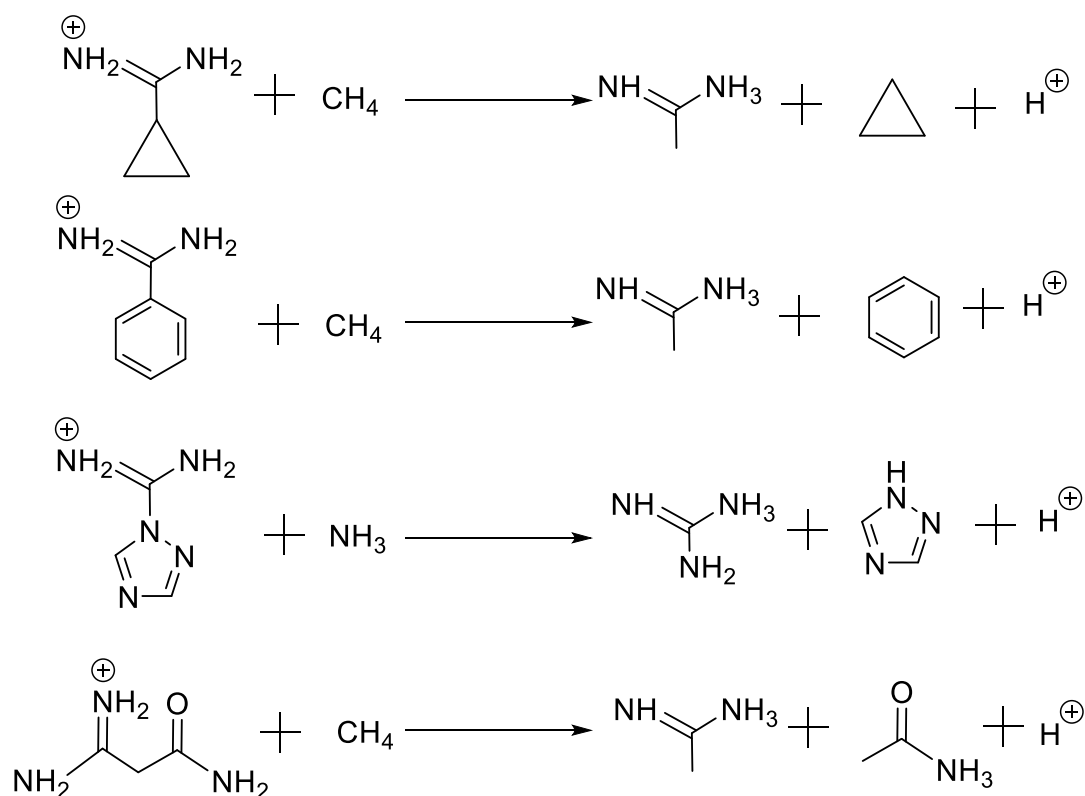

**Scheme S2.** Isodesmic reactions for all the calculated cations.

Table S23. Heat of formation

| Compound | $\Delta H_c^a(\text{anion})$ (kJ·mol <sup>-1</sup> ) | $\Delta H_c^b(\text{cation})$ (kJ·mol <sup>-1</sup> ) | $\Delta H_L^c$ (kJ·mol <sup>-1</sup> ) |
|----------|------------------------------------------------------|-------------------------------------------------------|----------------------------------------|
| 1        | 258.70                                               | 621.35                                                | 567.98                                 |
| 2        | 258.70                                               | 552.42                                                | 533.11                                 |
| 3        | 258.70                                               | 653.27                                                | 516.80                                 |
| 4        | 258.70                                               | 695.00                                                | 480.43                                 |
| 5        | 258.70                                               | 862.00                                                | 502.83                                 |
| 6        | 258.70                                               | 476.76                                                | 508.60                                 |
| 7        | 258.70                                               | 265.31                                                | 550.57                                 |

a. Heat of formation. b. Heat of formation. c. Lattice energy.

## 7. References

1. M. J. Frisch, G. W. Trucks, H. B. Schlegel, G. E. Scuseria, M. A. Robb, J. R. Cheeseman, G. Scalmani, V. Barone, B. Mennucci and G. A. Petersson, in *Gaussian 09*, Gaussian Inc Wallingford, 2009.
2. E. R. Johnson, S. Keinan, P. Mori-Sánchez, J. Contreras-García, A. J. Cohen and W. Yang, *J. Am. Chem. Soc.*, 2010, **132**, 6498-6506.
3. J. Zhang and T. Lu, *Phys. Chem. Chem. Phys.*, 2021, **23**, 20323-20328.
4. W. Humphrey, A. Dalke and K. Schulten, *J. Mol. Graphics*, 1996, **14**, 33-38.
5. T. Lu and F. Chen, *J. Comput. Chem.*, 2012, **33**, 580-592.
6. Z. Liu, T. Lu and Q. Chen, *Carbon*, 2021, **171**, 514-523.
7. P. R. Spackman, M. J. Turner, J. J. McKinnon, S. K. Wolff, D. J. Grimwood, D. Jayatilaka and M. A. Spackman, *J. Appl. Crystallogr.*, 2021, **54**, 1006-1011.
8. H. D. B. Jenkins, D. Tudela and L. Glasser, *Inorg. Chem.*, 2002, **41**, 2364-2367.
9. H. D. B. Jenkins, *Journal of Chemical Education*, 2005, **82**, 950.
10. E. F. C. Byrd and B. M. Rice, *The Journal of Physical Chemistry A*, 2009, **113**, 345-352.
11. H. D. B. Jenkins, H. K. Roobottom, J. Passmore and L. Glasser, *Inorg. Chem.*, 1999, **38**, 3609-3620.
12. P. J. Stephens, F. J. Devlin, C. F. Chabalowski and M. J. Frisch, *J. Phys. Chem. C*, 1994, **98**, 11623-11627.
13. K. Raghavachari, *Theor. Chem. Acc.*, 2000, **103**, 361-363.
14. J. A. Pople, J. S. Binkley and R. Seeger, *International Journal of Quantum Chemistry*, 1976, **10**, 1-19.
15. P. C. Hariharan and J. A. Pople, *Theor. Chem. Acc.*, 1973, **28**, 213-222.
16. K. O. Christie, D. A. Dixon, M. Vasiliu, R. Haiges and B. Hu, *Propellants, Explosives, Pyrotechnics*, 2019, **44**, 263-266.
17. Y. Tang, Z. Yin, A. K. Chinnam, R. J. Staples and J. n. M. Shreeve, *Inorg. Chem.*, 2020, **59**, 17766-17774.
18. V. Thaltiri, R. J. Staples and J. n. M. Shreeve, *Journal of Materials Chemistry A*, 2024, DOI: 10.1039/D4TA03084B.
